# Supplementary material
Source: PubMed Central journal article supplement (PMC3853082)
Supplement: mmc1.pdf [file mmc1.pdf]

# **Characterization of structure, dynamics and detergent interactions of the anti-HIV chemokine variant 5P12-RANTES**

**Maciej Wiktor<sup>a</sup>, Oliver Hartley<sup>b</sup> and Stephan Grzesiek<sup>a\*</sup>**

<sup>a</sup>Focal Area Structural Biology and Biophysics, Biozentrum, University of Basel,  
Klingelbergstrasse 50/70, 4056 Basel, Switzerland

<sup>b</sup>Department of Pathology and Immunology, Faculty of Medicine, University of Geneva

\*To whom correspondence should be addressed: Stephan Grzesiek, Department of Structural Biology, Biozentrum, University of Basel, Klingelbergstrasse 50/70, 4056 Basel, Switzerland, Tel.: +41 61 267 21; Fax +41 61 267 21 09;  
E-mail: [stephan.grzesiek@unibas.ch](mailto:stephan.grzesiek@unibas.ch)

## **Supporting Material**

## RANTES-E66S

5'-gga tcc gac gac gac gac aag **tc** cca **tat tcc tgc** gac acc **aca** ccc tgc tgc ttt gcc tac att gcc -3'  
 G S D D D D K **S** P **Y S S D** T **T P** C C F A Y I A  
 -7 -6 -5 -4 -3 -2 -1 0 1 2 3 4 5 6 7 8 9 10 11 12 13 14 15 16  
 G S D D D D K **Q G** P **P L M A** T **Q S** C C F A Y I A  
 5'-gga tcc gac gac gac gac aag **cag ggc** cca **cct tta atg** gcc acc **caa** tcc tgc tgc ttt gcc tac att gcc -3'

## 5P12-RANTES-E66S

0Q-S1G-RANTES-E66S primer pair

5'- ga tcc gac gac gac gac aag **cag ggc** cca tat tcc tgc gac acc -3'

5'- ggt gtc cga gga ata tgg **gcc ctg** ctt gtc gtc gtc gtc gga tc -3'

T8Q-P9S-RANTES-E66S primer pair

5'- c cca tat tcc tgc gac acc **caa** tcc tgc tgc ttt gcc tac att g -3'

5'- c aat gta ggc aaa gca gca gga **ttg** ggt gtc cga gga ata tgg g -3'

Y3P-S4L-S5M-D6A-RANTES-E66S primer pair

5'- gac gac aag **cag ggc** cca **cct tta atg** gcc acc **caa** tcc tgc tgc -3'

5'- gca gca gga **ttg** ggt ggc **cat taa agg** tgg **gcc ctg** ctt gtc gtc -3'

**Fig. S1** Generation of 5P12-RANTES-E66S DNA. Fragment of pGEV2 plasmid with the N-terminus of RANTES-E66S (top) and three primer pairs designed for site-directed mutagenesis PCR (bottom). Differing nucleotides and amino acids were marked with green (RANTES-E66S) and red (5P12-RANTES-E66S).

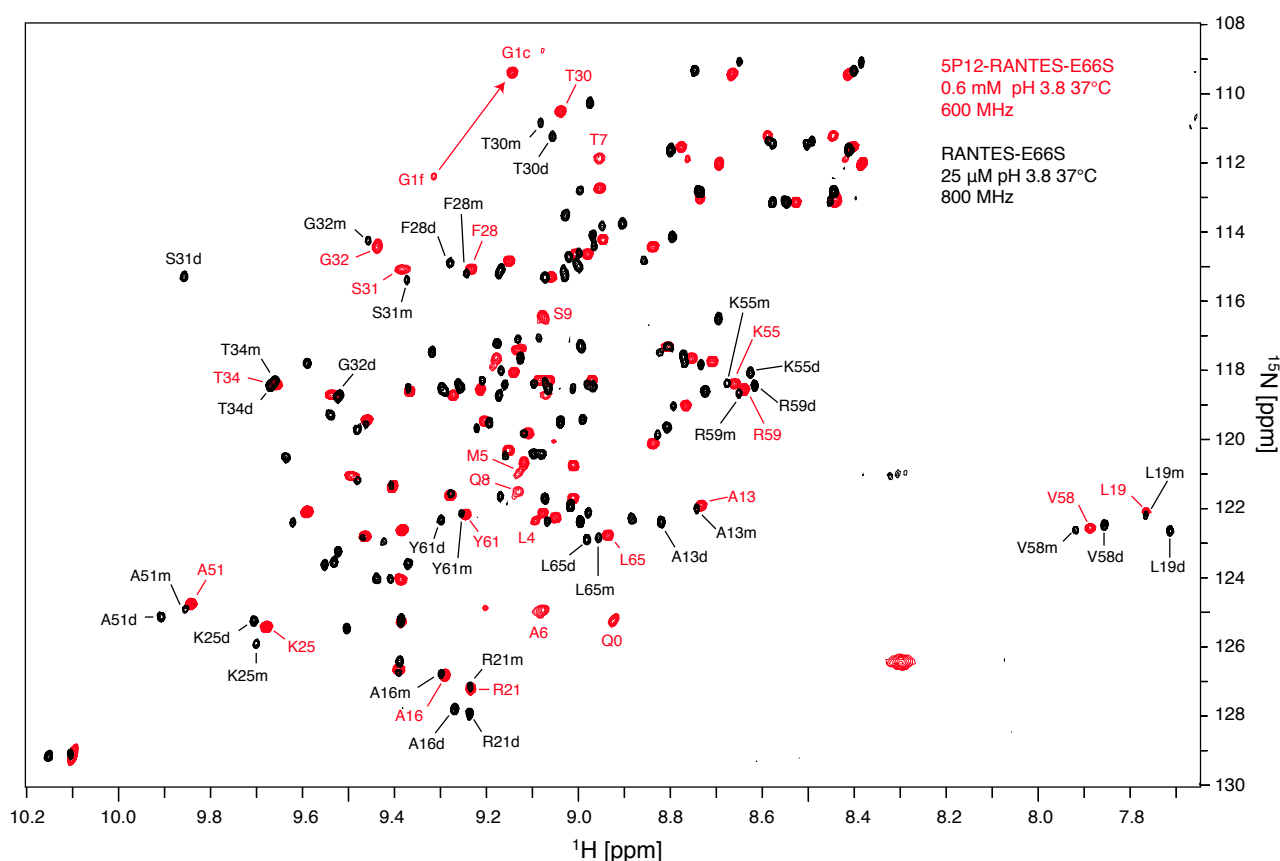

**Fig. S2** Overlay of  $^1\text{H}$ - $^{15}\text{N}$  HSQC spectrum of 25  $\mu\text{M}$  RANTES-E66S recorded intentionally at low concentration to increase monomer/dimer ratio (black) onto the spectrum of 0.6 mM 5P12-RANTES-E66S (red). Exemplary resonances are labeled with assignment information and with letters m for monomers and d for dimers. Chemical shifts of 5P12-RANTES-E66S resonances (A13, R21, S31, A51, Y61, etc.) are more similar to RANTES-E66S monomer (A13m, R21m, S31m, A51m, Y61m, etc.) than to RANTES-E66S dimer (A13d, R21d, S31d, A51d, Y61d, etc.) resonances. As a result of the N-terminal Q0 cyclization of 5P12-RANTES-E66S a shift from the “free” G1f to the “cyclic” G1c is observed (red arrow).

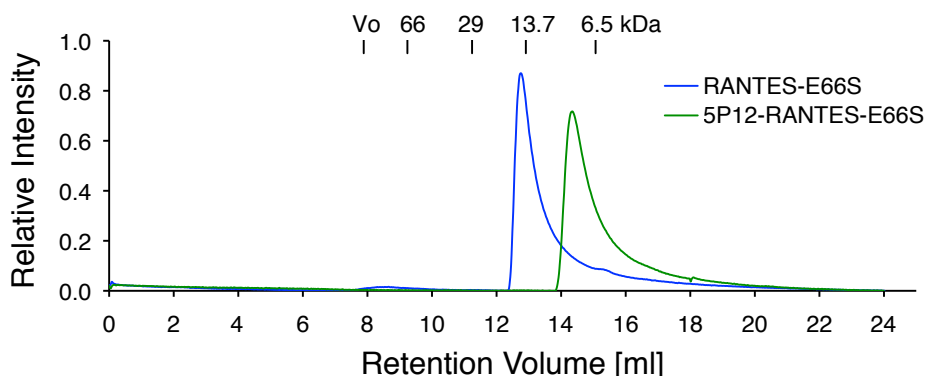

**Fig. S3** Size exclusion chromatography of RANTES-E66S (blue) and 5P12-RANTES-E66S (green). RANTES-E66S elutes at  $\sim 12.8$  ml which corresponds to  $15.7 \pm 0.1$  (SD) kDa and matches the size of RANTES-E66S dimer (15.6 kDa). 5P12-RANTES-E66S elutes at  $\sim 14.3$  ml which corresponds to  $8.5 \pm 0.4$  kDa ( $N=2$ ) and is in good agreement with the mass of 5P12-RANTES-E66S monomer (7.9 kDa). The experiment was performed with  $40 \mu\text{g}$  of each RANTES variant on a Superdex 75 10/300 GL column (GE Healthcare, Little Chalfont, UK) in 20 mM  $\text{Na}_2\text{HPO}_4$  pH 7.4, 180 mM NaCl at RT and 0.5 mL/min flow rate. The column was calibrated using blue dextran, albumin, carbonic anhydrase, aprotinin (Sigma-Aldrich, St. Louis, USA) and ribonuclease A (Invitrogen, Carlsbad, USA).  $V_0$ , void volume (7.9 mL).

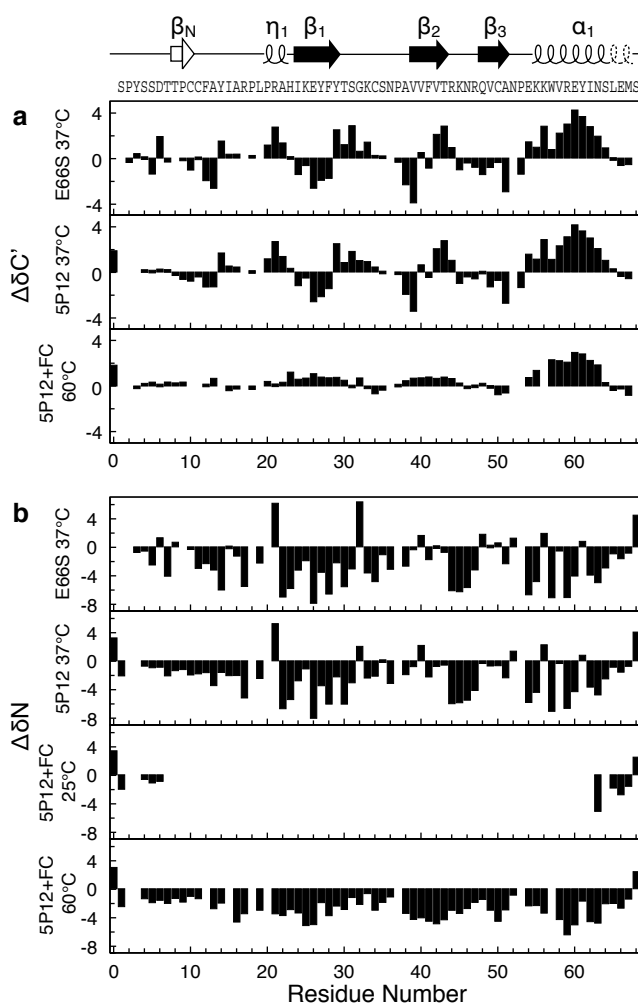

**Fig. S4** Secondary  $^{13}\text{C}'$  (a) and  $^{15}\text{N}$  (b) chemical shifts analysis of RANTES-E66S dimer (37 °C), 5P12-RANTES-E66S (37 °C) and 5P12-RANTES-E66S in the presence of 1 % FC-12 (at 25 °C and 60 °C). Secondary structure elements according to the crystal structure 1EQT and the amino acid sequence of the wild type RANTES are drawn at the top.

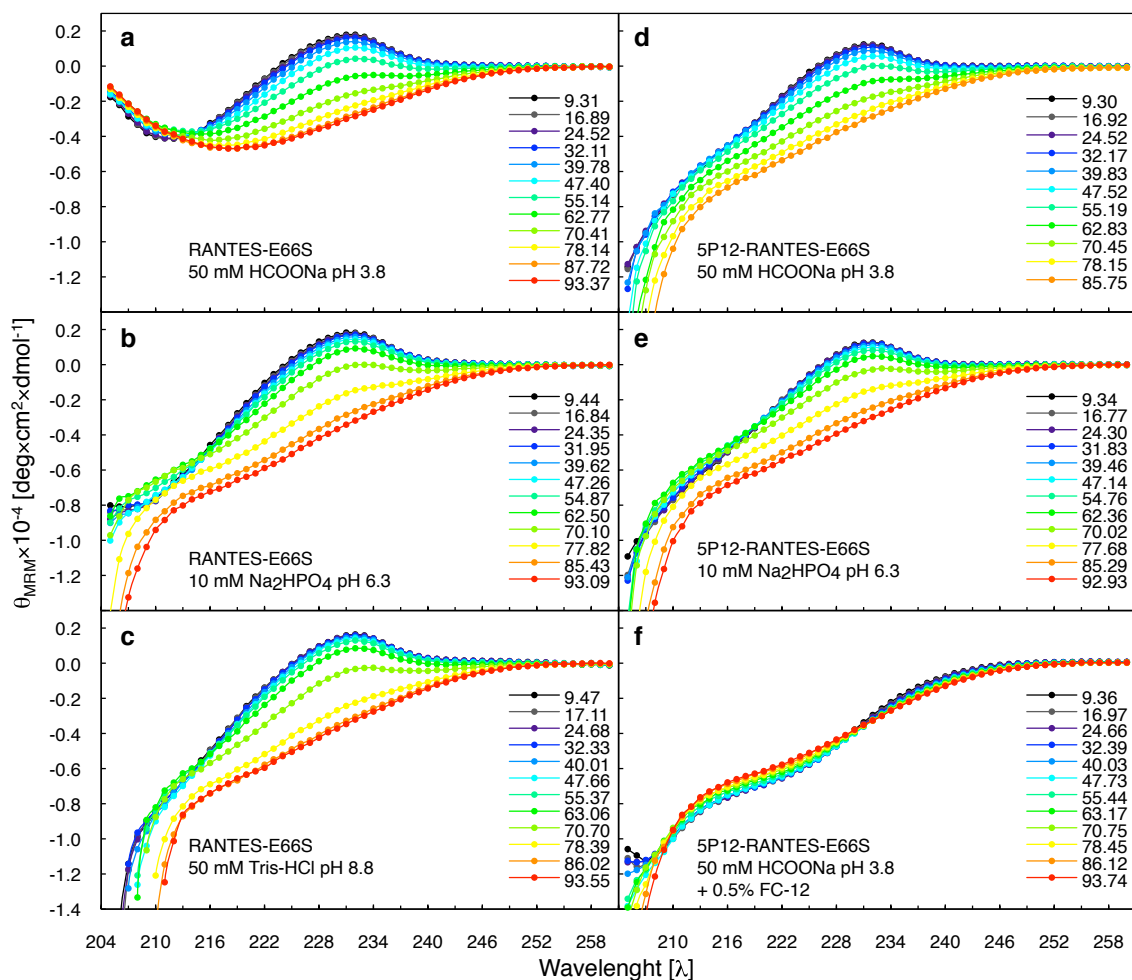

**Fig. S5** CD thermal denaturation experiments on RANTES-E66S (a-c) and 5P12-RANTES-E66S (d-f) at various conditions monitored as  $\theta_{\text{MRM}}$  in the 204-260 nm range. Spectra were collected every 2 degrees from 10 °C to 98 °C (set values). The labels correspond to the real temperature monitored by an independent sensor placed in the sample cuvette. For clarity of the presentation every fourth measurement is shown.

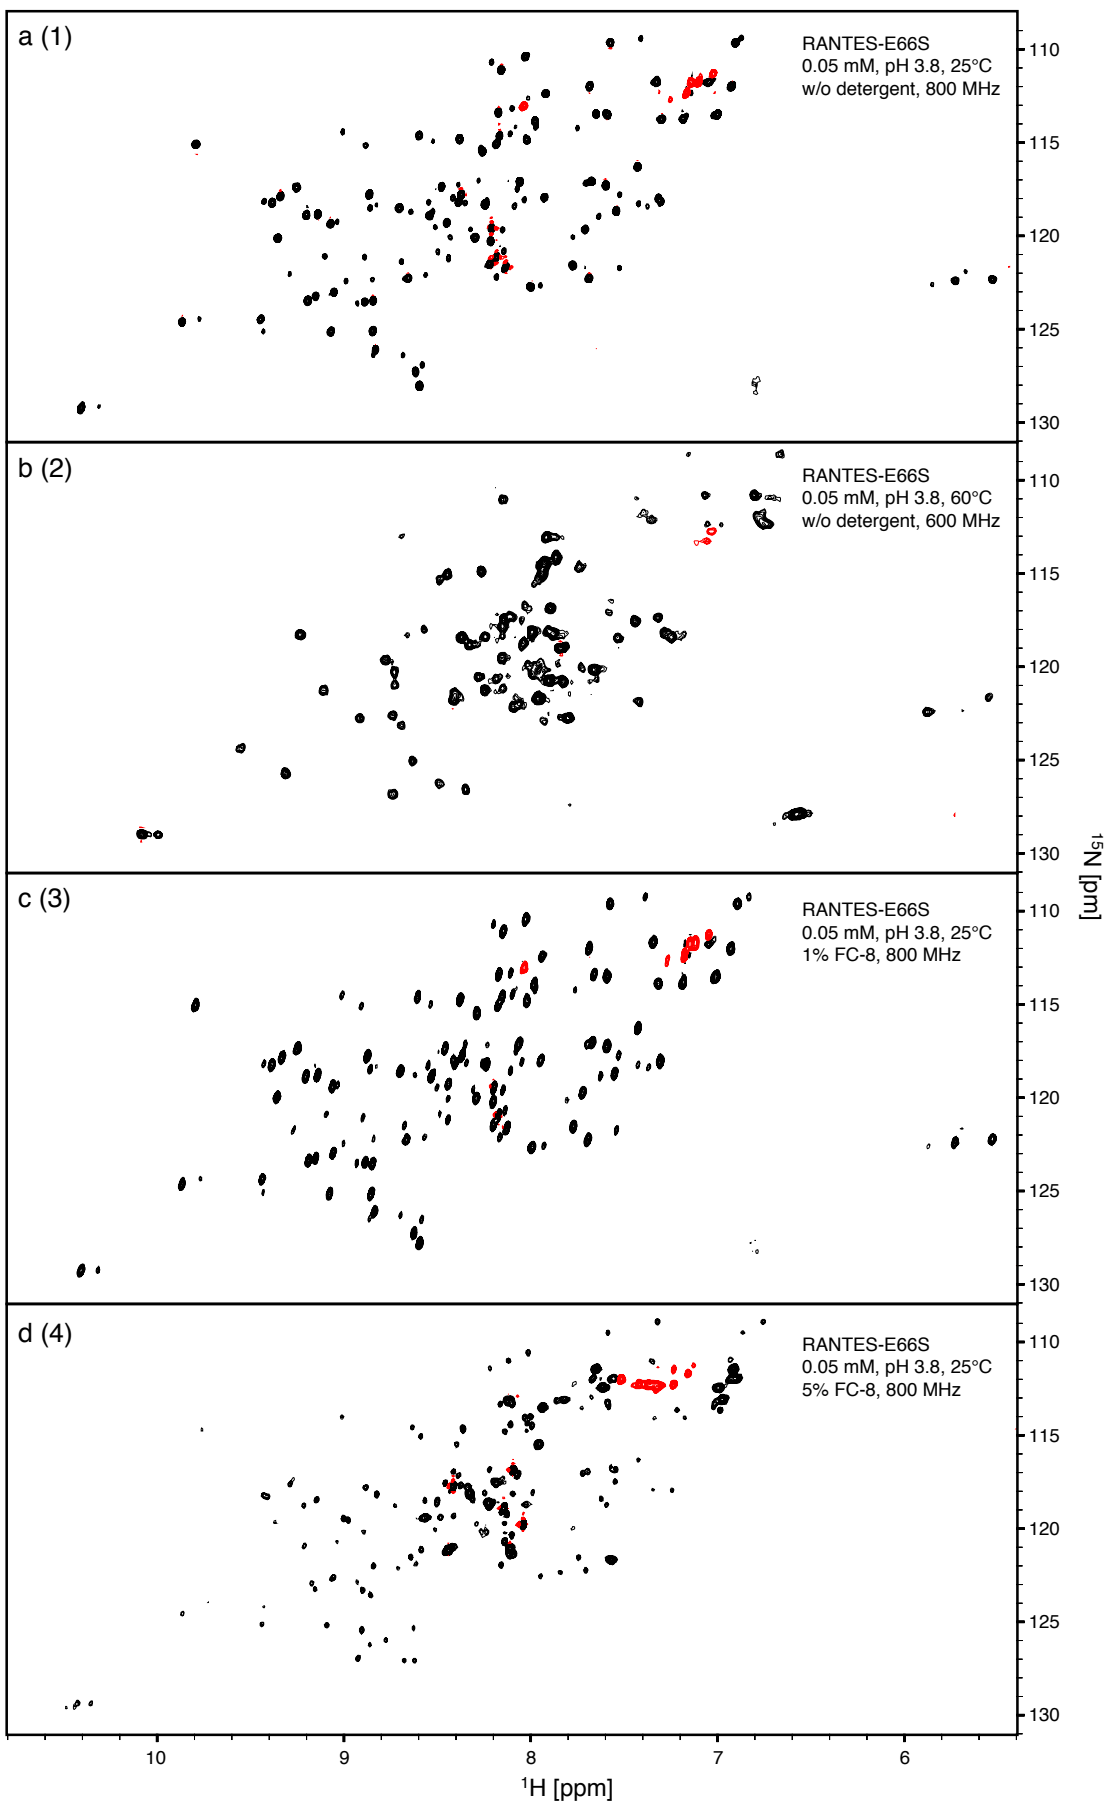

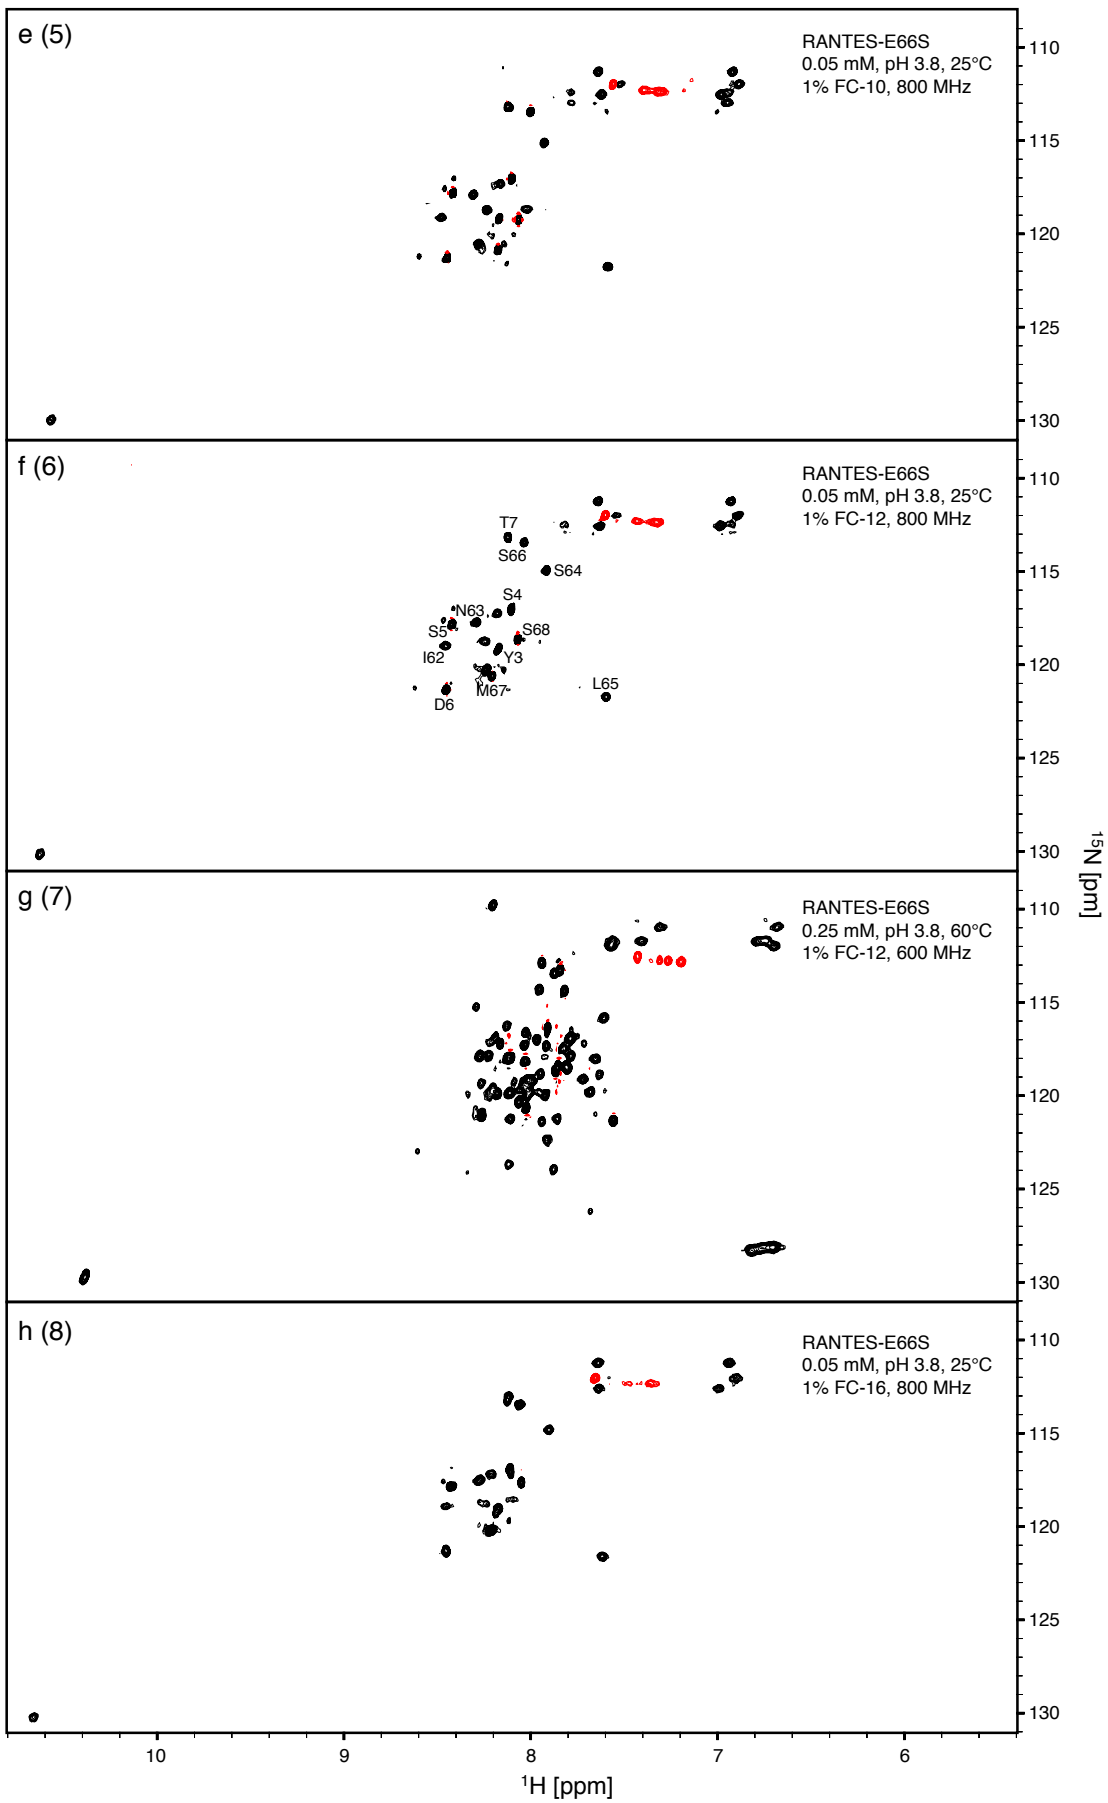

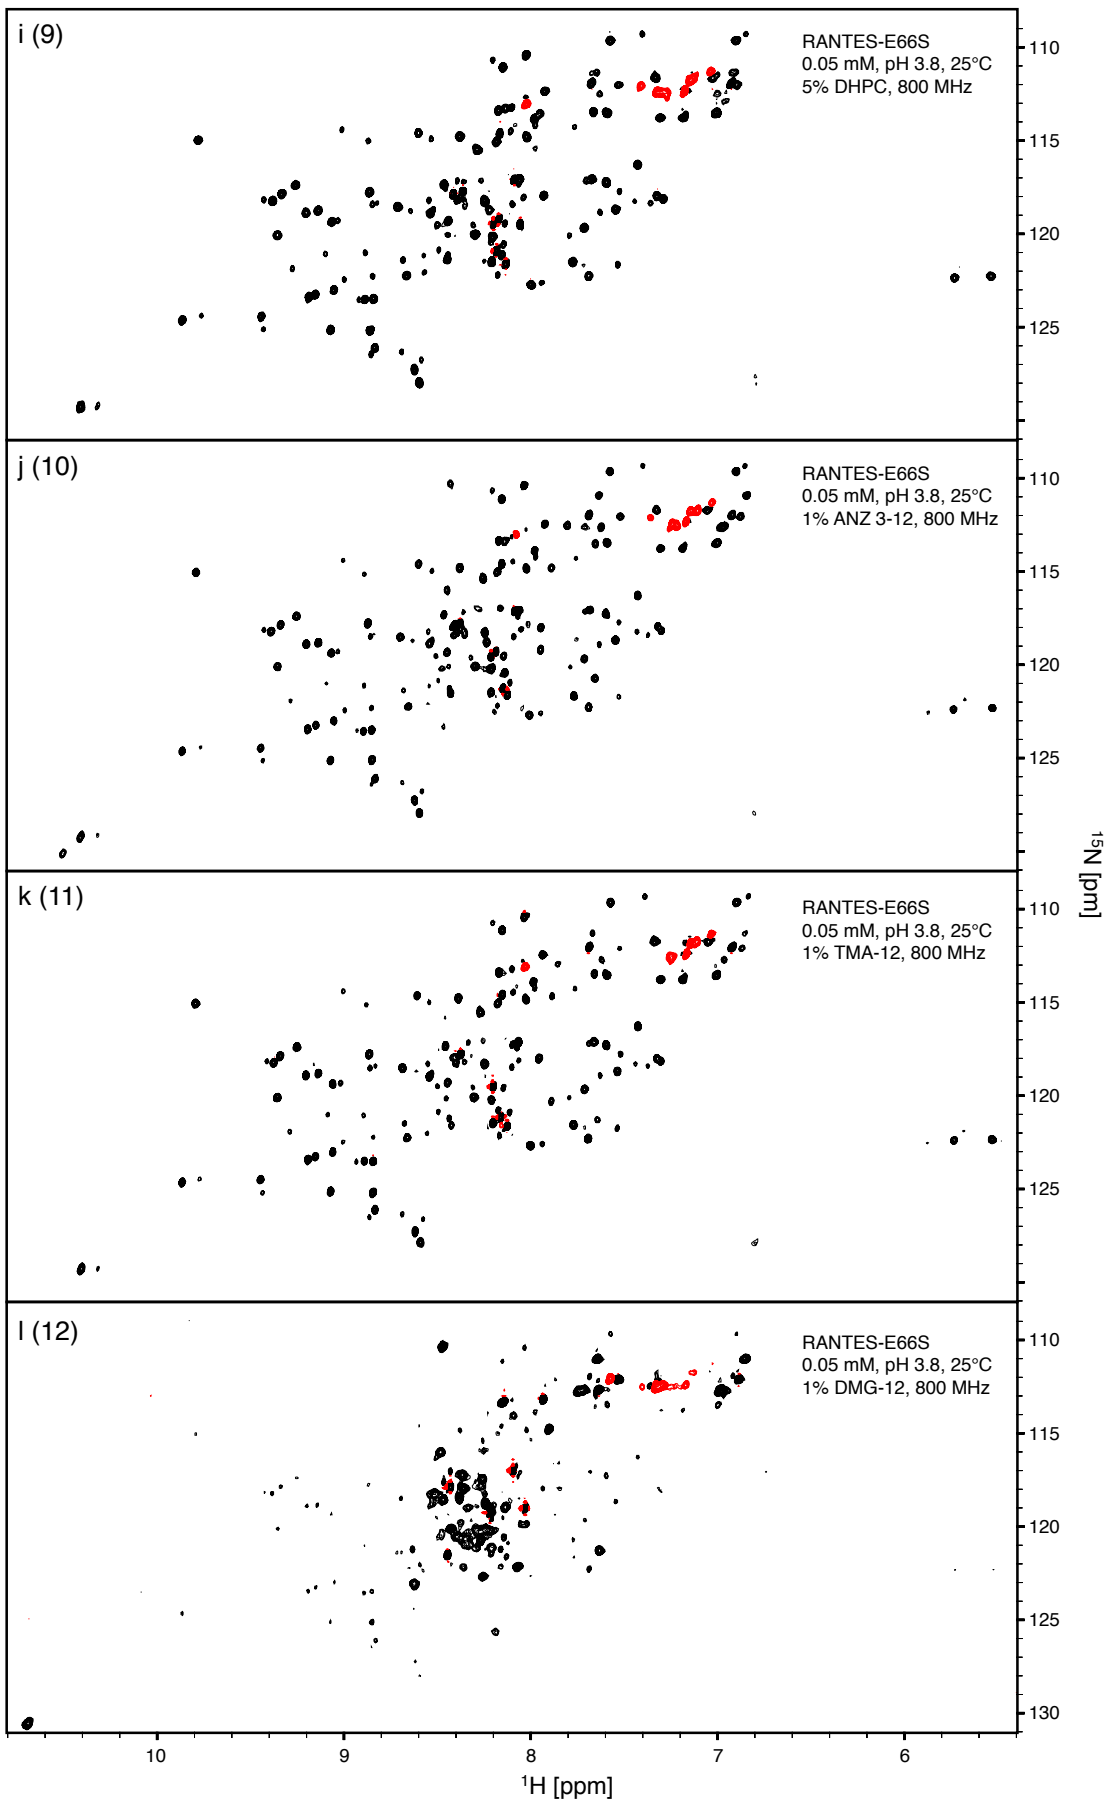

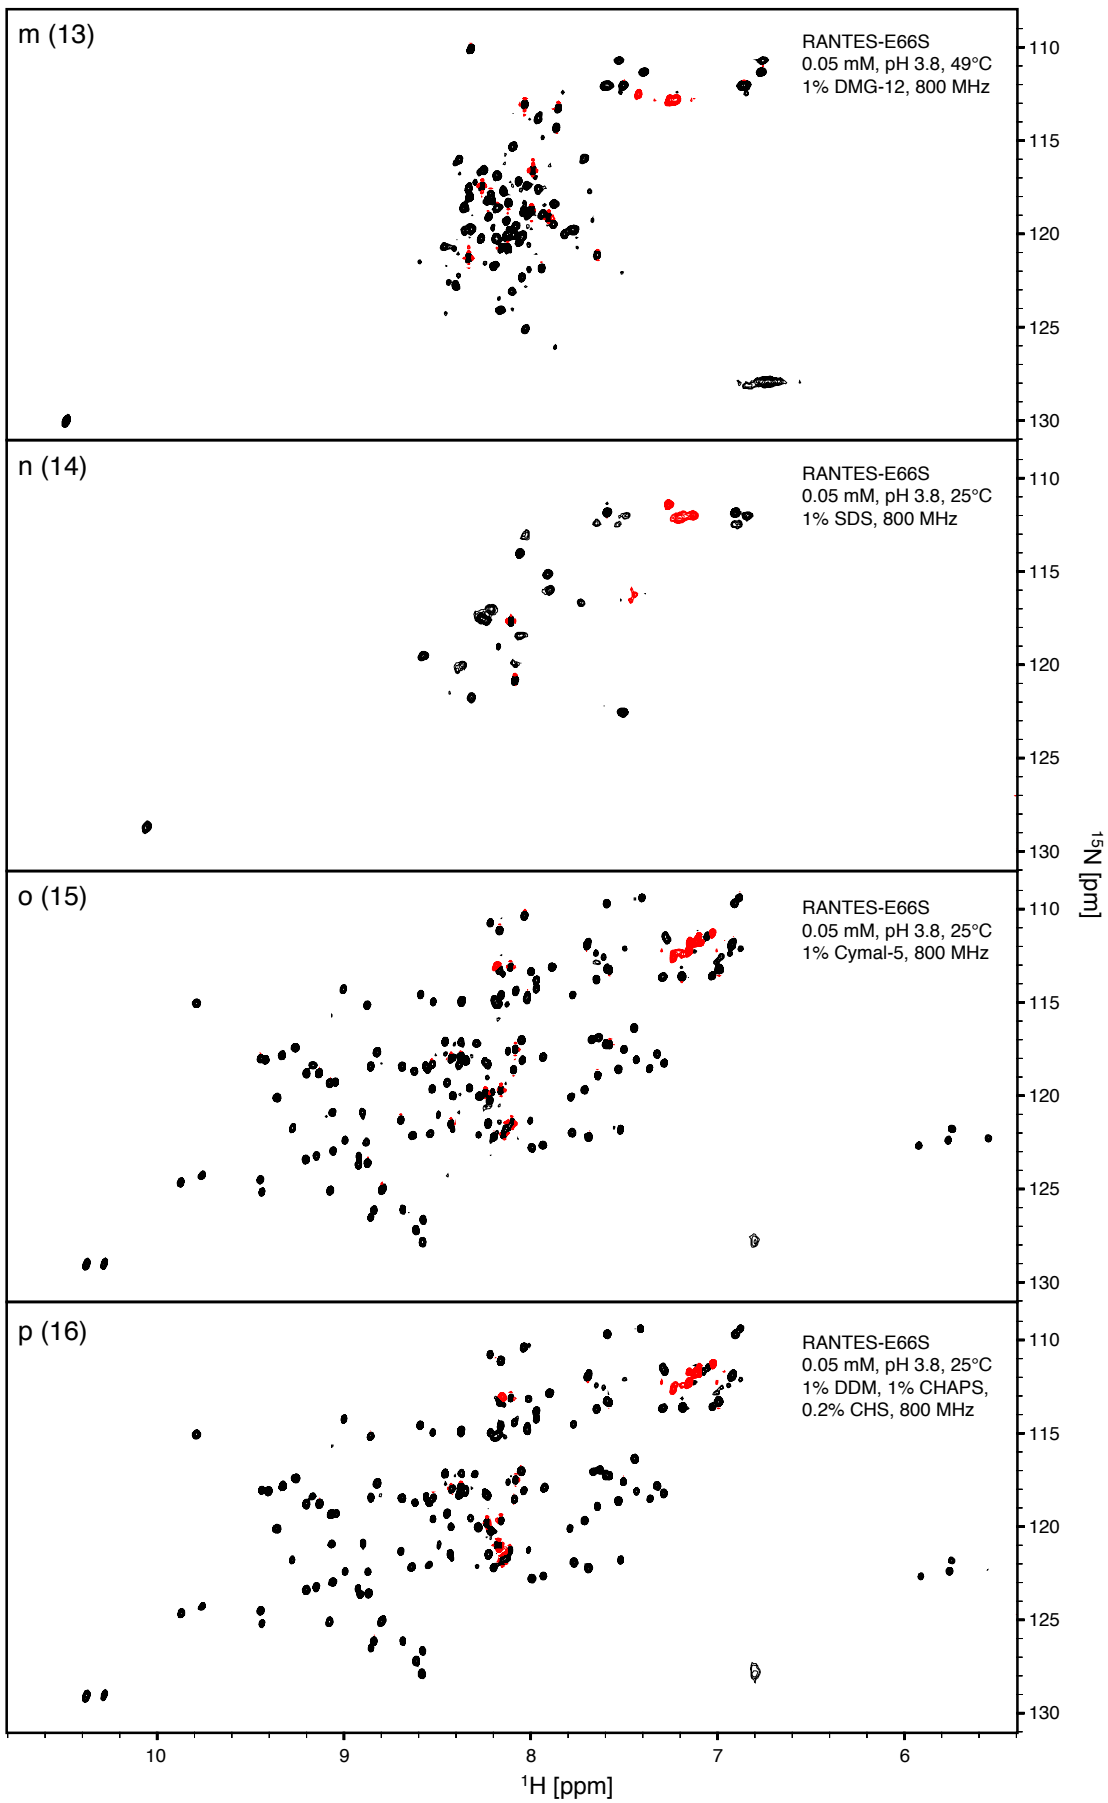



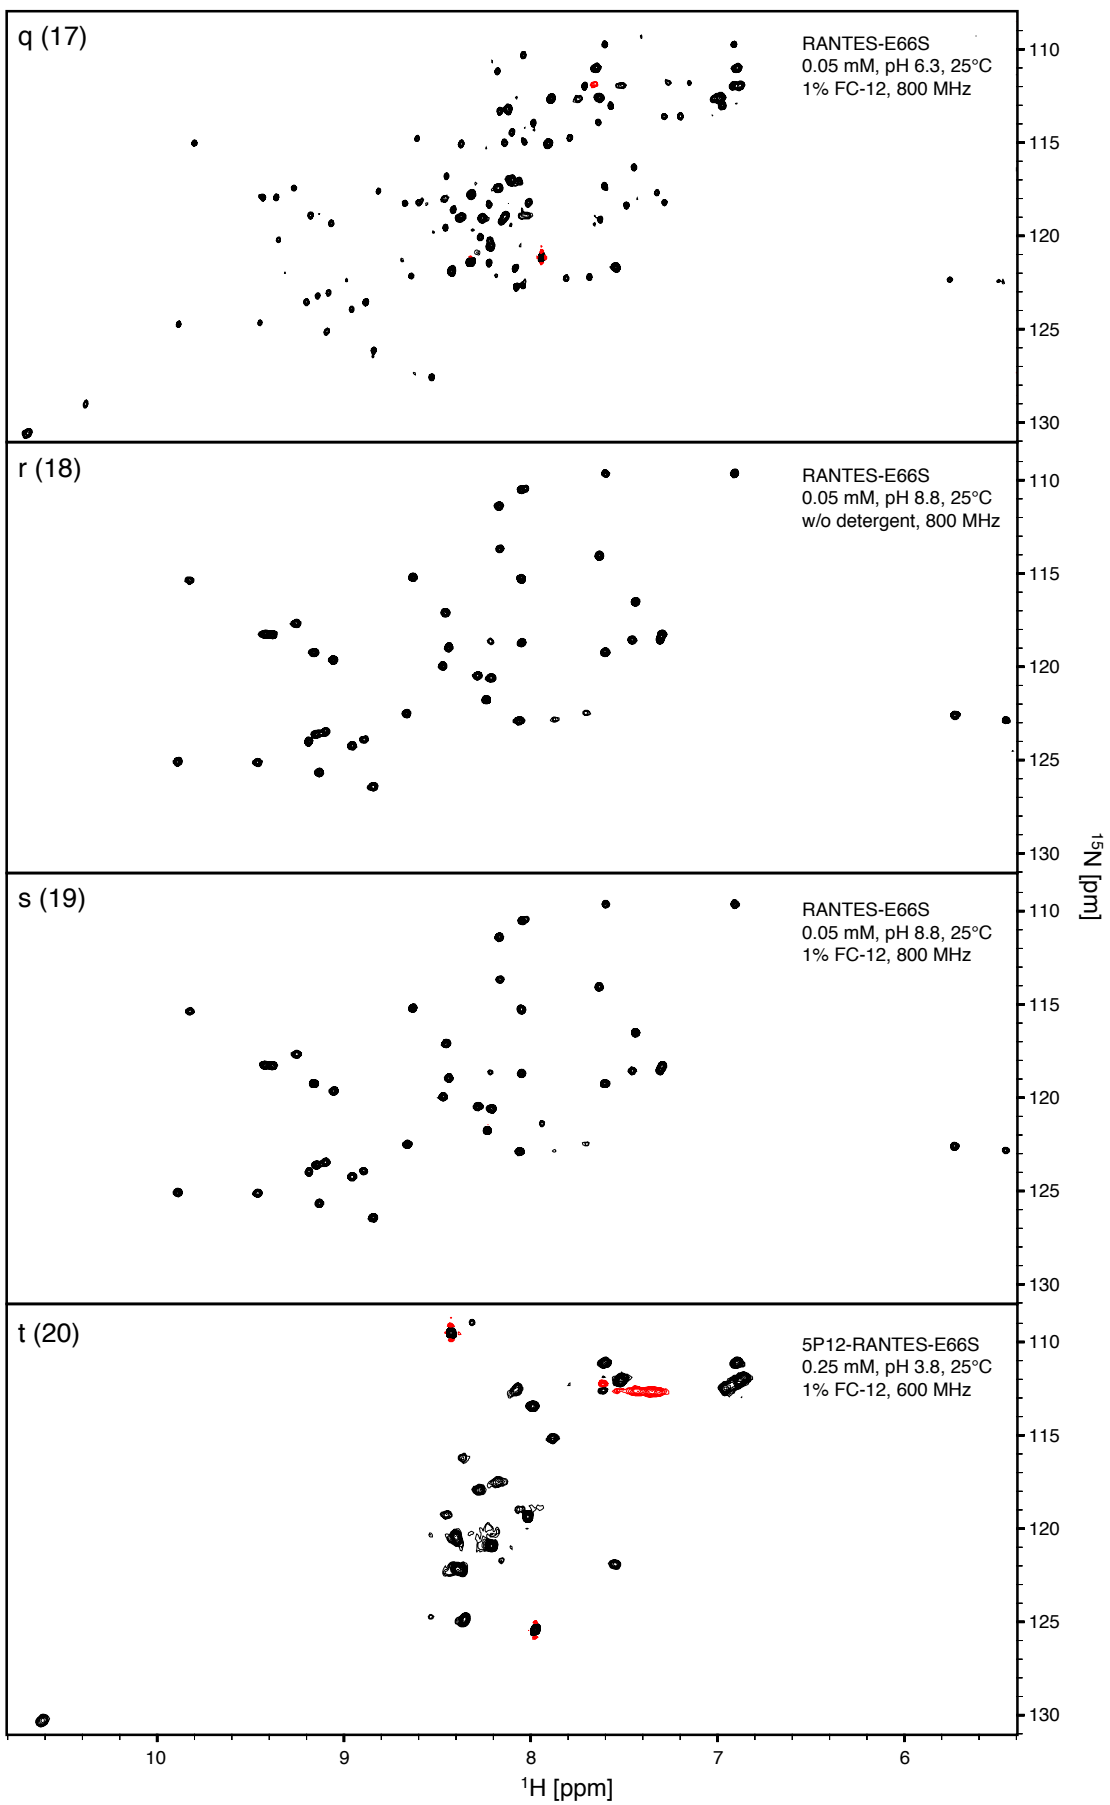

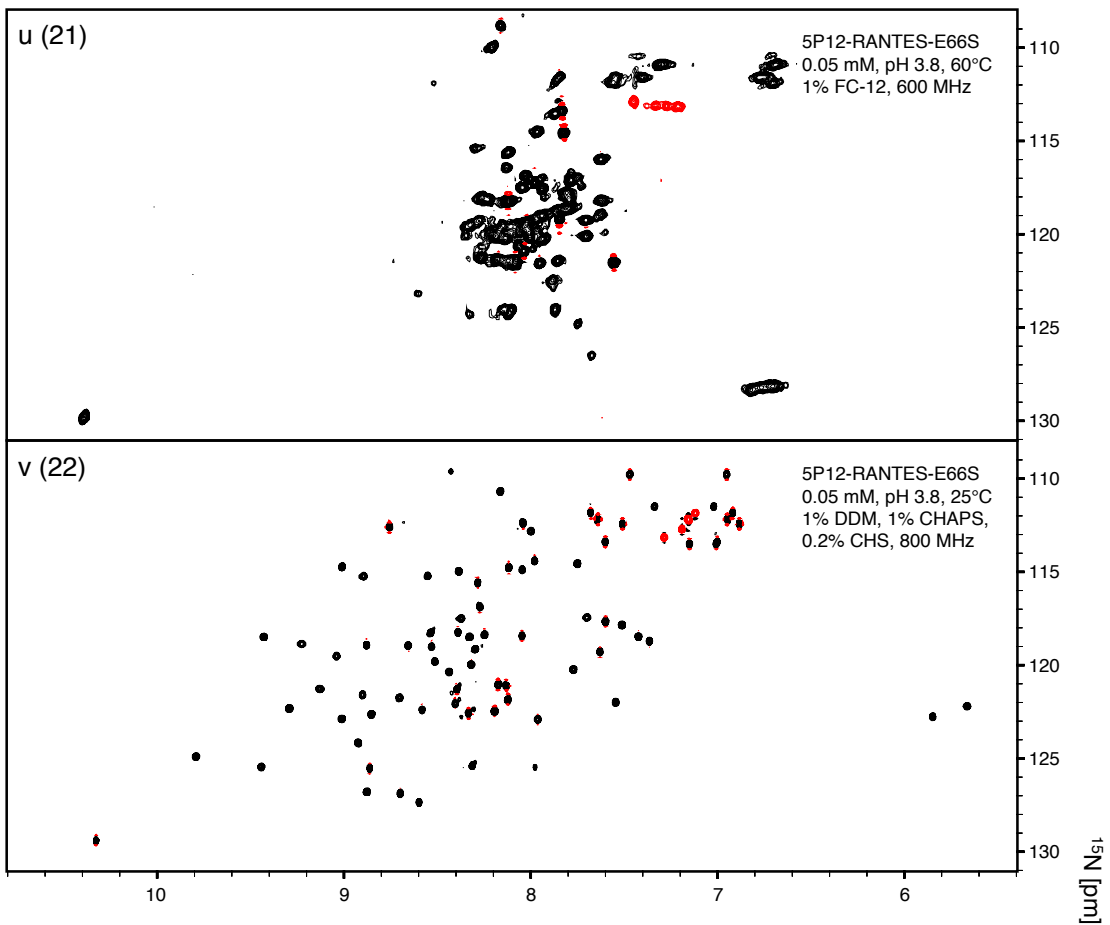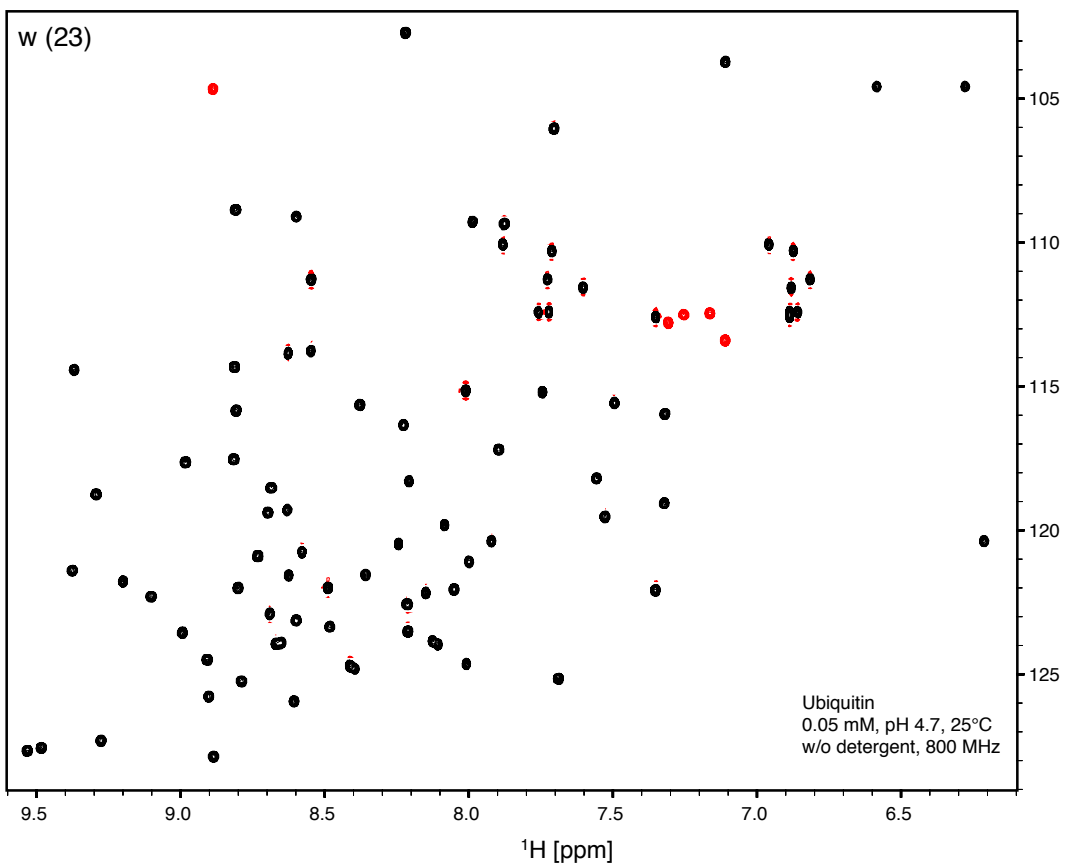

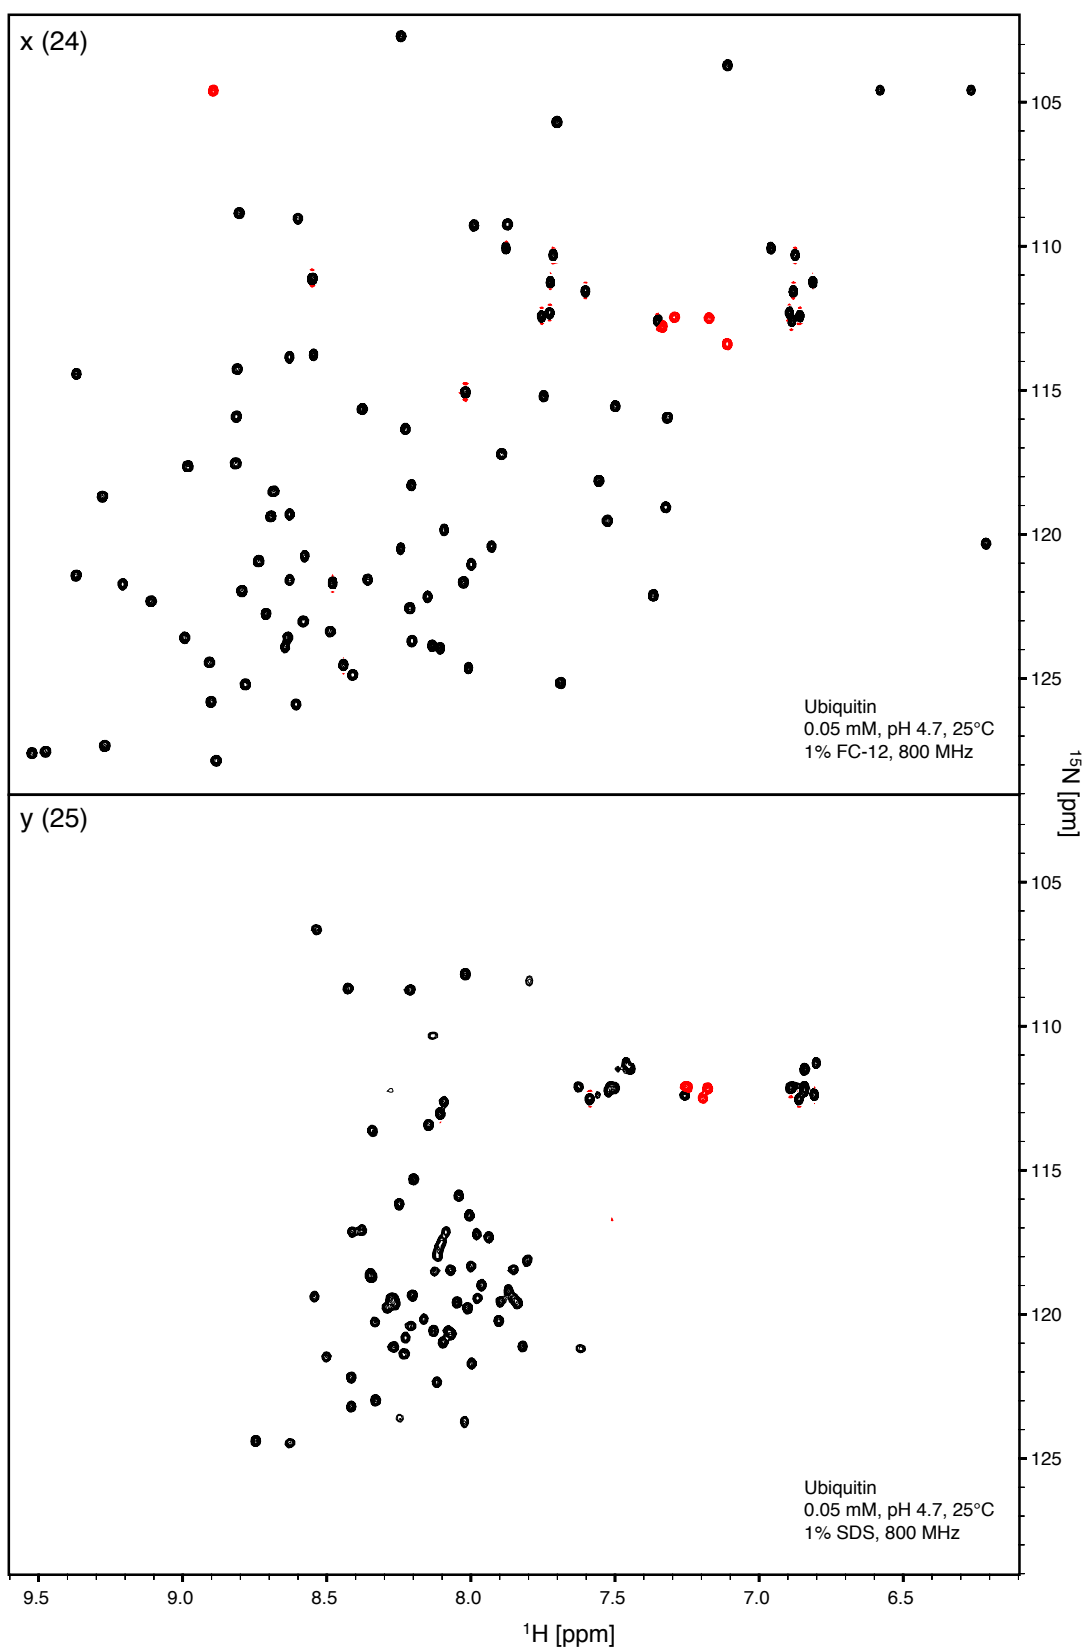

**Fig. S6**  $^1\text{H}$ - $^{15}\text{N}$  HSQC spectra (black/red, positive/negative signal) of RANTES-E66S (a-s), 5P12-RANTES-E66S (t-v) and ubiquitin (w-y) at various conditions specified in the top/bottom right corners. Numbers in the brackets correspond to the sample numbers in Table 1.

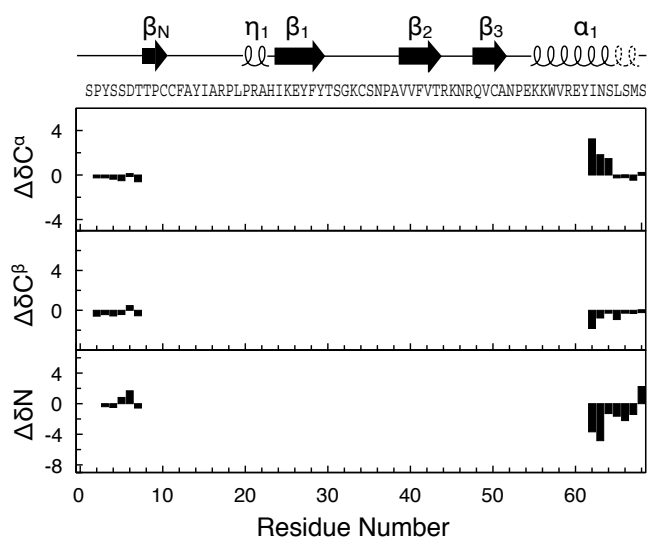

**Fig. S7** Secondary  $^{13}\text{C}^\alpha$ ,  $^{13}\text{C}^\beta$  and  $^{15}\text{N}$  chemical shifts analysis of the visible terminal resonances of RANTES-E66S in the presence of detergent at 25 °C ( $50\ \mu\text{M}$   $^2\text{H}$ ,  $^{15}\text{N}$ ,  $^{13}\text{C}$ -labeled protein, 50 mM DCOONa pH 3.8, 1% FC-12, 5%  $\text{D}_2\text{O}$ ) shows strong helical propensity for residues 62-64. Secondary structure elements according to the crystal structure 1EQT and the amino acid sequence of RANTES-E66S are drawn at the top.

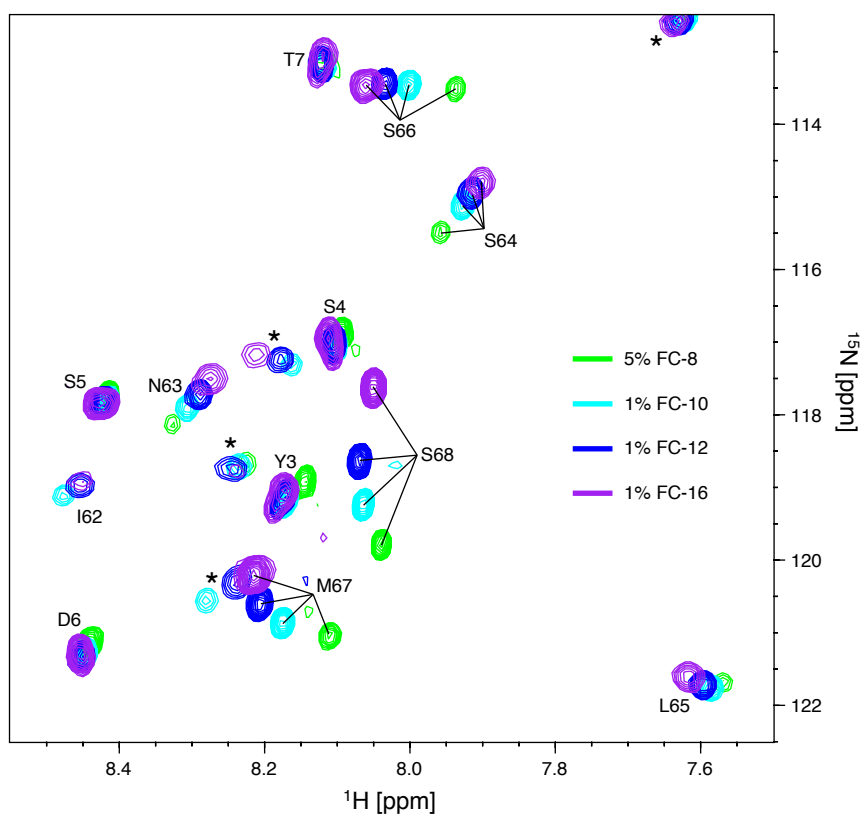

**Fig. S8**  $^1\text{H}$ - $^{15}\text{N}$  HSQC spectra of RANTES-E66S ( $50\ \mu\text{M}$   $^2\text{H}$ ,  $^{15}\text{N}$ ,  $^{13}\text{C}$ -labeled protein, 50 mM DCOONa pH 3.8, 5%  $\text{D}_2\text{O}$ ) at 25 °C in the presence of 5% FC-8 (green, higher threshold than in Fig. S7d), 1% FC-10 (cyan), 1% FC-12 (blue) and 1% FC-16 (purple). The C-terminal (N63-S68), but not the N-terminal (Y3-T7) resonances shift significantly with the increasing length of the detergent hydrocarbon tail. Unassigned resonances were marked with an asterisk.

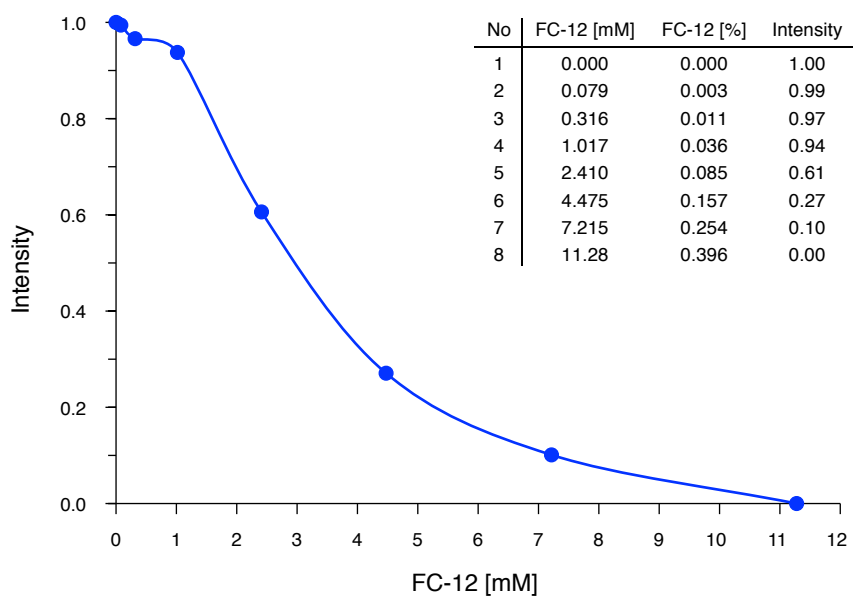

**Fig. S9** Intensity of native-state 5P12-RANTES-E66S backbone  $^1\text{H}$ - $^{15}\text{N}$  resonances (average of residues L4-S68) as a function of FC-12 concentration. With the exception of G1, the intensity of the resonances decreases uniformly throughout the amino acid sequence (Fig. S7b).

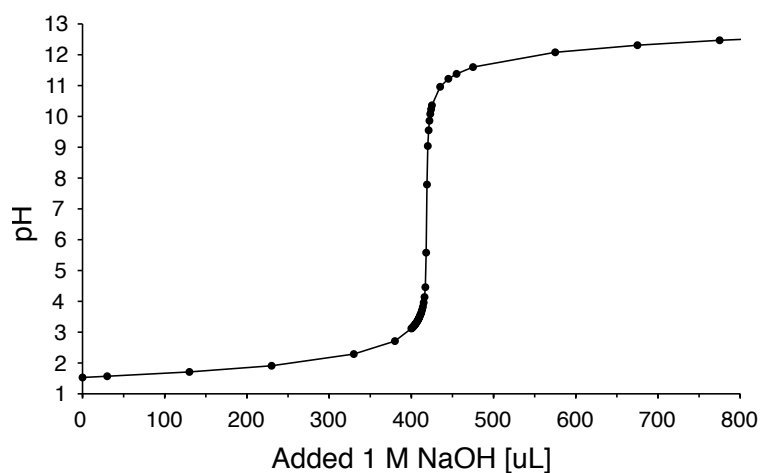

**Fig. S10** Titration of 20 mM FC-12 (10 mL). The solution was acidified to pH 1.5 with HCl and subsequently titrated with 1 M NaOH.

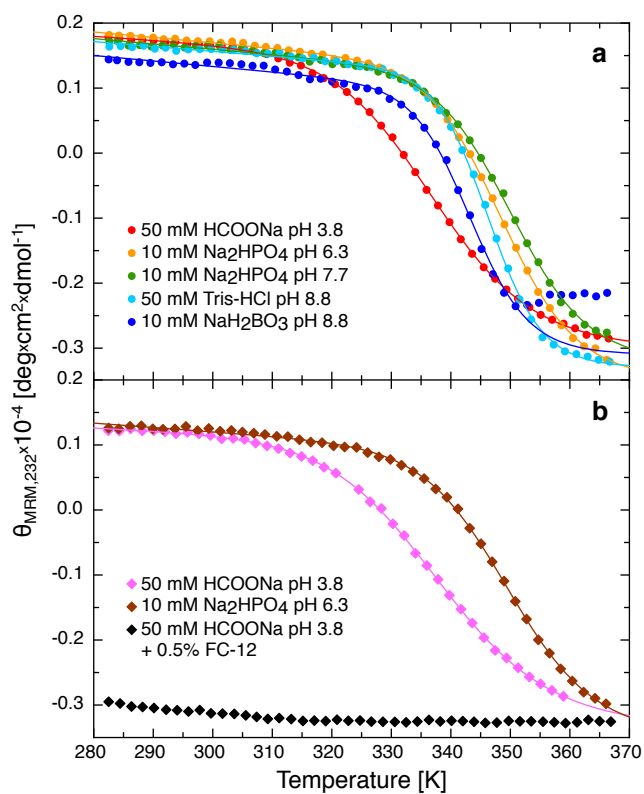

**Fig. S11** CD thermal denaturation experiments on RANTES-E66S (a) and 5P12-RANTES-E66S (b) at various conditions monitored as  $\theta_{\text{MRM}}$  at 232 nm. For the measurement in 10 mM  $\text{NaH}_2\text{BO}_3$  pH 8.8 (blue) data points beyond 352 K were omitted from fitting (protein precipitation). The pH was adjusted at RT. For the measurement in 50 mM Tris-HCl pH 8.8 (cyan), the real pH values at a given temperature deviates from the value at RT due to the large temperature coefficient of the Tris protonation ( $d(\text{p}K_a)/dT = -0.028$ ).

**Table S1** List of used detergents including their acronyms, chemical names, molecular weight (MW), approximate critical micelle concentration (CMC), approximate aggregation number (AN) and chemical structure.

| Detergent                                                                            | MW    | CMC [mM]           | CMC [%]   | AN                  | Chemical Structure |
|--------------------------------------------------------------------------------------|-------|--------------------|-----------|---------------------|--------------------|
| FC-8 (Fos-Choline-8)<br>n-Octylphosphocholine                                        | 295.4 | 114 <sup>1</sup>   | 3.4       | N/A                 |                    |
| FC-10 (Fos-Choline-10)<br>n-Decylphosphocholine                                      | 323.4 | 11 <sup>1</sup>    | 0.35      | 24 <sup>1</sup>     |                    |
| FC-12 (Fos-Choline-12)<br>n-Dodecylphosphocholine                                    | 351.5 | 1.5 <sup>1</sup>   | 0.047     | 54 <sup>1</sup>     |                    |
| FC-16 (Fos-Choline-16)<br>n-Hexadecylphosphocholine                                  | 407.5 | 0.013 <sup>1</sup> | 0.00053   | 178 <sup>1</sup>    |                    |
| DHPC<br>1,2-Diheptanoyl- <i>sn</i> -Glycero-3-<br>Phosphocholine                     | 481.5 | 1.4 <sup>2</sup>   | 0.067     | N/A                 |                    |
| ANZ-3-12 (Anzergent-3-12)<br>n-Dodecyl-N,N-Dimethyl-3-<br>Ammonio-1-Propanesulfonate | 335.5 | 2.8 <sup>1</sup>   | 0.094     | 55-87 <sup>1</sup>  |                    |
| TMA-12<br>N-Dodecyl<br>Trimethylammonium Chloride                                    | 263.9 | 1-20 <sup>3</sup>  | 0.03–0.53 | N/A                 |                    |
| DMG-12<br>n-Dodecyl-N,N-<br>Dimethylglycine                                          | 271.4 | 1.5 <sup>1</sup>   | 0.041     | N/A                 |                    |
| SDS<br>Sodium Dodecyl Sulfate                                                        | 288.4 | 8 <sup>2</sup>     | 0.23      | 62 <sup>4</sup>     |                    |
| Cymal-5<br>5-Cyclohexyl-1-Pentyl-β-D-<br>Maltoside                                   | 494.5 | 2.4 <sup>1</sup>   | 0.12      | 47 <sup>1</sup>     |                    |
| DDM<br>n-Dodecyl-β-D-<br>Maltopyranoside                                             | 510.6 | 0.17 <sup>1</sup>  | 0.0087    | 78-149 <sup>1</sup> |                    |
| CHAPS<br>3-[(3-Cholamidopropyl)-<br>Dimethylammonio]-1-Propane<br>Sulfonate          | 614.9 | 8 <sup>1</sup>     | 0.49      | 10 <sup>1</sup>     |                    |
| CHS<br>Cholesteryl Hemisuccinate<br>Tris Salt                                        | 607.9 | N/A                | N/A       | N/A                 |                    |

<sup>1</sup> According to Anatrace product information

<sup>2</sup> According to Avanti product information

<sup>3</sup> Depending on salt according to Sarac and Bester-Rogac (1)

<sup>4</sup> According to Turro and Yekta (2)

## References

1. Sarac, B., and M. Bester-Rogac. 2009. Temperature and salt-induced micellization of dodecyltrimethylammonium chloride in aqueous solution: a thermodynamic study. *J Colloid Interface Sci* 338:216-221.
2. Turro, N. J., and A. Yekta. 1978. Luminescent probes for detergent solutions. A simple procedure for determination of the mean aggregation number of micelles. *J Am Chem Soc* 100:5951–5952.
